# Supplementary material
Source: Springer Nature journal article supplement (https://www.springermedizin.de/resource/supplementary/12885_2009_2155_MOESM9_ESM.pdf/9460644)

A

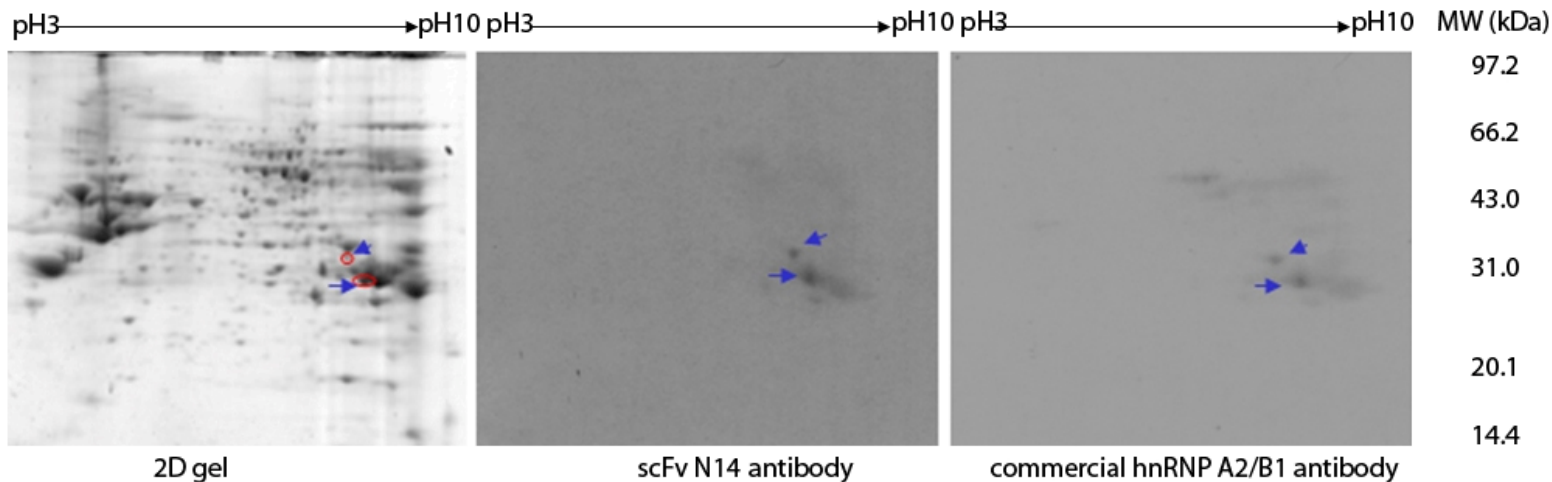

B

MEREKEQFRKLFIGGLSFETTEESLRNYYEQWGKLTDCVVMRDPA  
 SKRSRGFGFVTFSSMAEVDAAMAARPHSIDGRVVEPKRAVAREEES  
GKPGAHVTVKKL FVGGIKEDTEEHHLRDYFEEYGKIDTIEIITDR  
 QSGKKRGFGGFVTFDDHDPVDKIVLQKYHTINGHNAEVRKALSRQE  
MQEVQSSRSGRGGNFGFGDSRGGGNFGPGPGSNFRGGSDGYGSG  
 RFGDGYNGYGGGPGGGNFGGSPGYGGGRGGYGGGGPGYGNQGGG  
 YGGGYDNYGGGNYGSGNYNDFGNYNQQPSNYGPMKSGNFGGSRNM  
GGPYGGGNYGPGGSGGSGGYGGRSRY

C

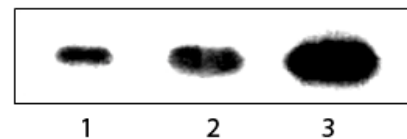

Supplement: MOESM9 [file 9460644]
